# Clitoral Surgery After Female Genital Mutilation/Cutting

Aesthetic Surgery Journal  
2017, Vol 37(9) NP113–NP115  
© 2017 The American Society for  
Aesthetic Plastic Surgery, Inc.  
Reprints and permission:  
journals.permissions@oup.com  
DOI: 10.1093/asj/sjx095  
www.aestheticsurgeryjournal.com

**OXFORD**  
UNIVERSITY PRESS

Jasmine Abdulcadir, MD; Omar Abdulcadir, MD; Martin Caillet, MD;  
Lucrezia Catania, MD; Béatrice Cuzin, MD; Birgitta Essén, PhD;  
Pierre Foldès, MD; Sara Johnsdotter, PhD;  
Crista Johnson-Agbakwu, MD, MSc, FACOG, IF;  
Nawal Nour, MD, MPH; Charlemagne Ouedraogo, MD;  
Nicole Warren, PhD, MPH, CNM; and Sophie Wylomanski, MD

Editorial Decision date: May 5, 2017; online publish-ahead-of-print August 17, 2017.

Chang et al report their interesting preliminary results after clitoral restoration procedures on 3 women having undergone female genital mutilation/cutting (FGM/C).<sup>1</sup> The authors conclude that “currently, there is no published literature regarding reconstructive management of FGM and, their early experience can provide a straightforward, short, and effective approach to improve the lives for women who have suffered from FGM.”<sup>1</sup> Indeed, among the seven references cited, no recent evidence on surgical management of FGM/C is provided.

It is crucial to clarify that since clitoral reconstruction after FGM/C was first reported in Egypt by Thabet<sup>2</sup> and

in France by Foldès<sup>3,4</sup> more than ten years ago, multiple scholarly publications on the surgery have been published including case reports,<sup>5</sup> case series,<sup>3,4,6-11</sup> a case-control study,<sup>2</sup> and systematic<sup>12</sup> and scoping reviews.<sup>13,14</sup> These publications have addressed the surgical techniques as well as safety, sexual and pain outcomes, and multidisciplinary management. Recommendations and best practice statements on clitoral surgery are available in the Guidelines on Management of Female Genital Mutilation of the Royal College of Obstetricians and Gynecologists (RCOG) of 2015<sup>15</sup> and of the World Health Organization (WHO) of 2016.<sup>16</sup> Neither the RCOG nor the WHO could

---

Dr J. Abdulcadir is the Founder, Outpatient Clinic for Women with FGM/C, Department of Obstetric and Gynecology, Geneva University Hospitals. Faculty of Medicine, University of Geneva, Geneva, Switzerland. Dr O. Abdulcadir is the Founder and Director, and Dr Catania is a Consultant. Referral Centre for Preventing and Curing Female Genital Mutilation, Department of Maternal and Child Health, Careggi University Hospital, Florence, Italy. Dr Caillet is the Head of CeMAViE; and Deputy Head of Clinic, Department of Gynecology and Obstetrics, University Saint Pierre Hospital, Brussels, Belgium. Dr Cuzin is a Consultant, Division of Urology and Transplantation, Edouard Herriot Hospital, Lyon, France. Dr Essén is a Professor, Department of Women’s and Children’s Health, Uppsala University, Uppsala, Sweden. Dr Foldès is the Co-founder, Institute of Reproductive Health, Saint Germain en Laye, Paris, France. Dr Johnsdotter is a Professor, Faculty of Health and Society, Malmö University, Malmö, Sweden. Dr Johnson-Agbakwu is the Founder and Director, Refugee Women’s Health Clinic, Obstetrics

& Gynecology, Maricopa Integrated Health System; and Research Assistant Professor, Obstetrics and Gynecology, University of Arizona College of Medicine, Phoenix, AZ, USA. Dr Nour is the Director, Global Ob/Gyn and African Women’s Health Center, Ambulatory Obstetrics, Office for Multicultural Careers, Division of Global Obstetrics and Gynecology, Brigham and Women’s Hospital; and an Associate Professor, Harvard Medical School, Boston, MA, USA. Dr Ouedraogo is a Professor, University Hospital Yalgado Ouedraogo of Ouagadougou, Ouagadougou, Burkina Faso. Dr Warren is an Assistant Professor, Department of Community Public Health Nursing, John Hopkins School of Nursing, Baltimore, MD, USA. Dr Wylomanski is a Consultant, Department of Gynecology and Obstetrics, Nantes University Hospital, Nantes, France.

**Corresponding Author:**

Dr Jasmine Abdulcadir, 30 Bld de la Cluse 1211 Geneva 14, Switzerland.  
E-mail: [jasmine.abdulcadir@hcuge.ch](mailto:jasmine.abdulcadir@hcuge.ch)

support clitoral reconstruction based on the paucity of the evidence base. Both groups stressed the need for future, multicenter studies.<sup>15,16</sup>

Clitoral reconstruction seems a promising technique to address chronic pain by removing posttraumatic neuromas and fibrous tissue within the scar.<sup>17</sup> The technique may also improve sexual pleasure and body image.<sup>12</sup> However, there is growing evidence that women who do not suffer from pain, but request surgical management for other concerns, have their needs met by counseling, psychosexual therapy, health education to clarify sexual anatomy and function, and dispel cultural misconceptions and myths on the clitoris. According to available studies, when such multidisciplinary care is available before surgery, clitoral reconstruction is performed in less than 20% of the women who initially request it.<sup>5,6,18</sup>

Chang et al state that clitoral surgery “is not technically demanding and all plastic surgeons should be able to offer this option.”<sup>1</sup> We find this assertion troubling. In addition to minor and, less frequently, major complications reported in the literature, the surgery is highly complex in terms of its impact on future psychosexual function, social acceptance, and genital self-image. Negative psychological outcomes (eg, relapse of posttraumatic stress disorder on postoperative pain) have also occurred.<sup>19</sup> This is why clitoral surgery is increasingly offered in multidisciplinary referral centers where interprofessional teams include medical and cultural experts in FGM/C as well as sexual counselors, psychologists, psychiatrists, and sex therapists. Women living with FGM/C are often a vulnerable migrant population with a history of pasttraumatic events other than FGM/C such as war, rape, and forced marriage. These needs should be addressed without or in association with surgical management.<sup>6</sup>

Women who request clitoral reconstruction deserve multidisciplinary, honest, respectful, nonstigmatizing, holistic, and evidence-based care. Surgeons offering this technique are responsible for being familiar with the available evidence. Further rigorous research via multicenter, interprofessional collaborations are needed to obtain more conclusive evidence on clitoral reconstruction and to improve the comprehensive care and information offered to women who ask for it.

### Disclosures

The authors declared no potential conflicts of interest with respect to the research, authorship, and publication of this article.

### Funding

The authors received no financial support for the research, authorship, and publication of this article.

### REFERENCES

1. Chang C, Low DW, Percec I. Female Genital Mutilation Reconstruction: a preliminary report. *Aesthet Surg J*. 2017;37(8):942–946.
2. Thabet SM, Thabet AS. Defective sexuality and female circumcision: the cause and the possible management. *J Obstet Gynaecol Res*. 2003;29(1):12–19.
3. Foldes P. [Reconstructive plastic surgery of the clitoris after sexual mutilation]. *Prog Urol*. 2004;14(1):47–50.
4. Foldès P, Cuzin B, Andro A. Reconstructive surgery after female genital mutilation: a prospective cohort study. *Lancet*. 2012;380(9837):134–141.
5. Abdulcadir J, Rodriguez MI, Petignat P, Say L. Clitoral reconstruction after female genital mutilation/cutting: case studies. *J Sex Med*. 2015;12(1):274–281.
6. Antonetti Ndiaye E, Fall S, Beltran L. Benefits of multidisciplinary care for excised women. *J Gynecol Obstet Biol Reprod (Paris)*. 2015;44(9):862–869.
7. Merckelbagh HM, Nicolas MN, Piketty MP, Benifla JL. Assessment of a multidisciplinary care for 169 excised women with an initial reconstructive surgery project. *Gynecol Obstet Fertil*. 2015;43(10):633–639.
8. Ouédraogo CM, Madzou S, Simporé A et al. Clitoral reconstruction after female genital mutilation at CHU Yalgado of Ouagadougou, Burkina Faso. About 68 patients operated. *J Gynecol Obstet Biol Reprod (Paris)*. 2016;45(9):1099–1106.
9. Ouédraogo CM, Madzou S, Touré B, Ouédraogo A, Ouédraogo S, Lankoandé J. Practice of reconstructive plastic surgery of the clitoris after genital mutilation in Burkina Faso. Report of 94 cases. *Ann Chir Plast Esthet*. 2013;58(3):208–215.
10. Vital M, de Visme S, Hanf M, Philippe HJ, Winer N, Wylomanski S. Using the Female Sexual Function Index (FSFI) to evaluate sexual function in women with genital mutilation undergoing surgical reconstruction: a pilot prospective study. *Eur J Obstet Gynecol Reprod Biol*. 2016;202:71–74.
11. Foldes P, Louis-Sylvestre C. Results of surgical clitoral repair after ritual excision: 453 cases. *Gynecol Obstet Fertil*. 2006;34(12):1137–1141.
12. Abdulcadir J, Rodriguez MI, Say L. A systematic review of the evidence on clitoral reconstruction after female genital mutilation/cutting. *Int J Gynaecol Obstet*. 2015;129(2):93–97.
13. Johnson-Agbakwu C, Warren N. Interventions to Address Sexual Function in Women Affected by Female Genital Cutting: a Scoping Review. *Curr Sex Health Rep*. 2017;9(1):20–31.
14. Paterson LQP, Davis SN, Binik YM. Female genital mutilation/cutting and orgasm before and after surgical repair. *Sexologies*. 2012;21:3–8.
15. Royal College of Obstetricians and Gynaecologists. Female Genital Mutilation and its management. Green-top Guideline No. 53. 2015. <https://www.rcog.org.uk/en/guidelines-research-services/guidelines/gtg53/>. Accessed March 28, 2017.

16. WHO. WHO guidelines on management of health complications from female genital mutilation. Geneva: WHO; 2016. <http://www.who.int/reproductivehealth/topics/fgm/management-health-complications-fgm/en/>. Accessed March 28, 2017.
17. Abdulcadir J, Tille JC, Petignat P. Management of painful clitoral neuroma after female genital mutilation/cutting. *Reprod Health*. 2017;14(1):22.
18. De Schrijver L, Leye E, Merckx M. A multidisciplinary approach to clitoral reconstruction after female genital mutilation: the crucial role of counselling. *Eur J Contracept Reprod Health Care*. 2016;21(4):269-275.
19. Abdulcadir J, Bianchi Demicheli F, Willame A, Recordon N, Petignat P. Posttraumatic stress disorder relapse and clitoral reconstruction after female genital mutilation. *Obstet Gynecol*. 2017;129(2):371-376.

# Expert Legal Advice.

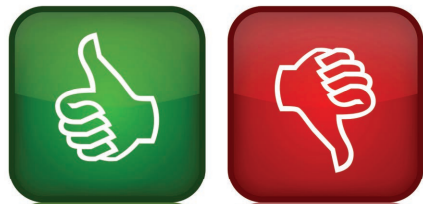

**Absolutely Free.**  
Who Else Can Offer That?

**E**xclusively for Members and Candidates for Membership of The Aesthetic Society. With rich legal experience in the medical field, Bob Aicher, Esq., is uniquely qualified to provide free Member consultations in the areas of practice management, insurance, malpractice, scope of practice, ethics, and defamation.

To contact Bob Aicher, Esq., please email [aicher@sbcglobal.net](mailto:aicher@sbcglobal.net) or call via phone at 707.321.6945.

*This service is not intended to replace legal counsel.*

Not yet a member of  
The Aesthetic Society?  
Learn more at  
[www.surgery.org/membership](http://www.surgery.org/membership)

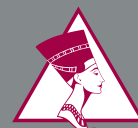

THE AMERICAN SOCIETY FOR  
AESTHETIC PLASTIC SURGERY, INC.

**For More Information**  
Toll-Free 800.364.2147  
562.799.2356
